# Supplementary material for: Characterization of a fluorescence imaging probe that exploits metabolic dependency of ovarian clear cell carcinoma
Source: PubMed Central journal article supplement (PMC10662153; doi:10.1038/s41598-023-47637-0), 2023-11-20
Supplement: 41598_2023_47637_MOESM1_ESM.pdf [file 41598_2023_47637_MOESM1_ESM.pdf]

Supplementary Table 1

Results of Steel-Dwass multiple testing for fluorescent immunostaining of 4-HNE.

|              | t     | p        |
|--------------|-------|----------|
| A2780-ES2    | 8.98  | 4.10E-14 |
| A2780-JHOS2  | 8.60  | 5.35E-14 |
| A2780-JHOS4  | 4.94  | 1.16E-05 |
| A2780-OVK18  | 1.70  | 5.34E-01 |
| A2780-OVTOKO | 8.19  | 7.46E-14 |
| ES2-JHOS2    | 6.03  | 2.53E-08 |
| ES2-JHOS4    | 4.68  | 4.12E-05 |
| ES2-OVK18    | 10.28 | 6.39E-14 |
| ES2-OVTOKO   | 10.21 | 5.28E-14 |
| JHOS2-JHOS4  | 3.89  | 1.42E-03 |
| JHOS2-OVK18  | 8.87  | 4.34E-14 |
| JHOS2-OVTOKO | 7.97  | 1.05E-13 |
| JHOS4-OVK18  | 4.97  | 9.77E-06 |
| JHOS4-OVTOKO | 4.77  | 2.77E-05 |
| OVK18-OVTOKO | 7.58  | 5.40E-13 |

Supplementary Table 2

Results of Tukey's multiple comparison test for detection of intracellular Fe<sup>2+</sup>.

|              | diff.mean | lwr    | upr    | adjusted p-value |
|--------------|-----------|--------|--------|------------------|
| ES2-A2780    | 14.95     | -36.68 | 66.57  | 0.87             |
| JHOS2-A2780  | -27.46    | -79.08 | 24.16  | 0.45             |
| OVK18-A2780  | -2.79     | -54.42 | 48.83  | 1.00             |
| OVTOKO-A2780 | 25.75     | -25.88 | 77.37  | 0.51             |
| JHOS2-ES2    | -42.40    | -94.03 | 9.22   | 0.12             |
| OVK18-ES2    | -17.74    | -69.36 | 33.88  | 0.79             |
| OVTOKO-ES2   | 10.80     | -40.82 | 62.42  | 0.95             |
| OVK18-JHOS2  | 24.66     | -26.96 | 76.29  | 0.54             |
| OVTOKO-JHOS2 | 53.20     | 1.58   | 104.83 | 0.04*            |
| OVTOKO-OVK18 | 28.54     | -23.08 | 80.16  | 0.41             |

\*denotes significant difference.

Abbreviations: diff mean, mean difference; lwr, lower end point of the interval; upr, upper end

point of the interval

Supplementary Table 3

Primers used for quantitative RT-PCR.

| Gene                  | Primer | Template-specific sequence (5'-3') | Annealing Temp. [°C] |
|-----------------------|--------|------------------------------------|----------------------|
| <b><i>GGT1</i></b>    | F      | GTGTTCTGCCGGGATAGAAA               | 55                   |
|                       | R      | CAGGTCCTCAGCTGTCACAA               |                      |
| <b><i>GLS1</i></b>    | F      | AGGTGGTGATCAAAGGGTAAAG             | 54                   |
|                       | R      | TCCATGTCCATAGCTGACAAAG             |                      |
| <b><i>GPx4</i></b>    | F      | GAGGCAAGACCGAAGTAAACTAC            | 55                   |
|                       | R      | CCGAACTGGTTACACGGGAA               |                      |
| <b><i>SLC7A11</i></b> | F      | ATGCAGTGGCAGTGACCTTT               | 54                   |
|                       | R      | GGCAACAAAGATCGGAACTG               |                      |
| <b><i>GCLC</i></b>    | F      | GGAAGTGGATGTGGACACCAGA             | 53                   |
|                       | R      | GCTTGTAGTCAGGATGGTTTG CG           |                      |
| <b><i>hACTB</i></b>   | F      | CACACTGTGCCCATCTACGA               | 55                   |
|                       | R      | CTCCTTAATGTCACGCACGA               |                      |

Abbreviations: F, forward primer; R, reverse primer

Supplementary Figure 1

Time course of fluorescence intensity in CCC, normal ovary and endometrium samples in 12 cases.

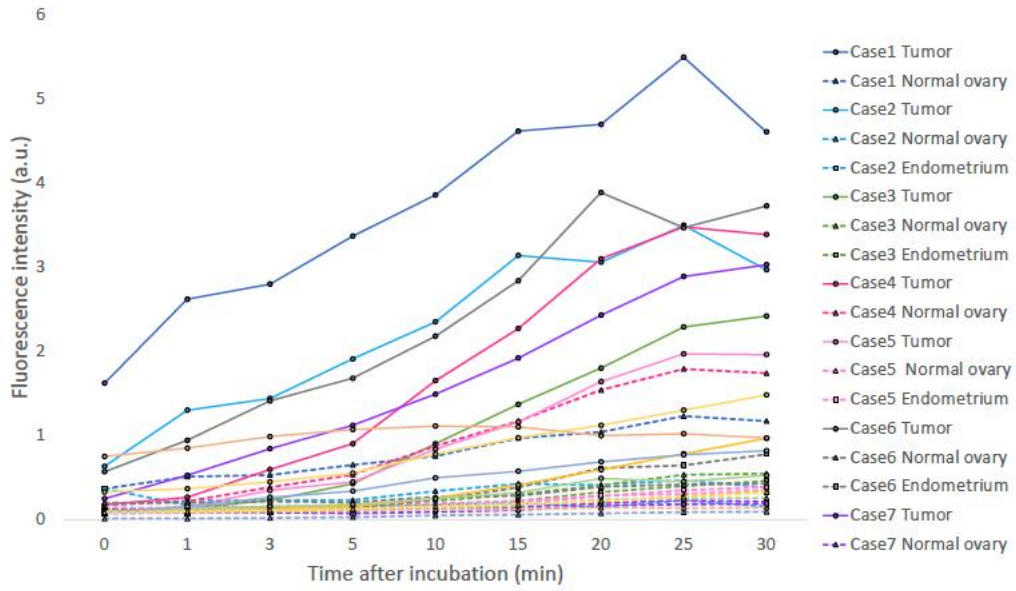

Line colors in the graph indicate each case. Solid lines with circles indicate tumors, dotted lines with triangles indicate normal ovaries, and dotted lines with squares indicate endometrium.
